# Supplementary material
Source: PubMed Central journal article supplement (PMC6383582)
Supplement: Supp_Fig2.pdf [file Supp_Fig2.pdf]

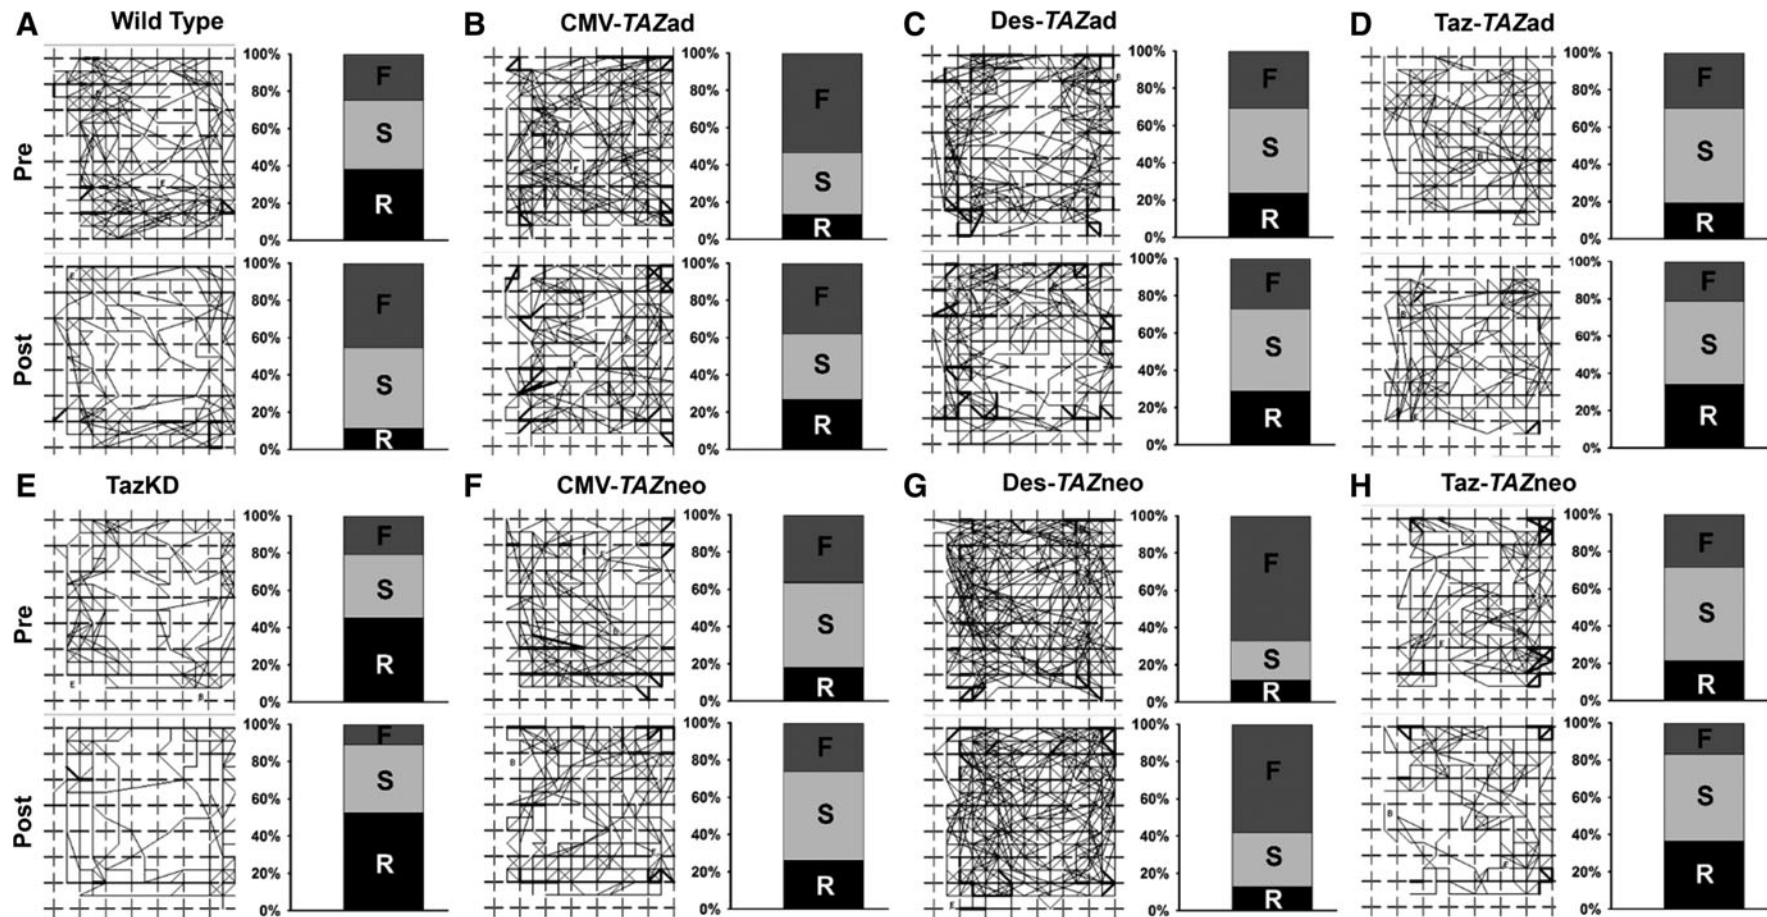

**Supplementary Figure S2.** Mouse activity maps. (A–H) Representative mouse activity maps from each cohort of mice and corresponding activity type distribution graphs for each. A clear improvement in ability to explore the arena is observed in all treatment groups as compared to untreated TazKD mice. Data was acquired at 5 months of age. ad, adult administration; neo, neonatal administration; F, fast movement; R, resting time; S, slow movement.
