# Supplementary material
Source: PubMed Central journal article supplement (PMC6383582)
Supplement: Supp_Table1.pdf [file Supp_Table1.pdf]

**Supplementary Table S1.** *List of Taqman gene expression probes used in the study*

| <i>Gene</i>                                               | <i>Catalog</i> | <i>Company</i>    |
|-----------------------------------------------------------|----------------|-------------------|
| 18S ribosomal RNA ( <i>18S</i> )                          | Mm03928990_g1  | Thermo Scientific |
| Tafazzin ( <i>TAZ</i> )                                   | Hs00794094_m1  | Thermo Scientific |
| Glyceraldehyde-3-phosphate dehydrogenase ( <i>GAPDH</i> ) | Mm99999915_g1  | Thermo Scientific |
