# Supplementary material
Source: PubMed Central journal article supplement (PMC6383582)
Supplement: Supp_Table2.pdf [file Supp_Table2.pdf]

**Supplementary Table S2. List of antibodies used in the study**

| <i>Protein</i>                                   | <i>Dilution (Western Blotting/Immunofluorescence)</i> | <i>Company</i>                |
|--------------------------------------------------|-------------------------------------------------------|-------------------------------|
| Glyceraldehyde-3-phosphate dehydrogenase (GAPDH) | 1:5000 / –                                            | Cell Signaling (#2118)        |
| Tafazzin (TAZ)                                   | 1:200 / 1:200                                         | Sigma Aldrich (#WH0006901M12) |
| Myc-tag (MYC)                                    | 1:500 / 1:200                                         | Sigma Aldrich (#PLA0001)      |
| Cytochrome C oxidase subunit II (MTCO2)          | – / 1:200                                             | Abcam (#ab110258)             |
