# Supplementary material
Source: PubMed Central journal article supplement (PMC6383582)
Supplement: Supp_Table3.pdf [file Supp_Table3.pdf]

**Supplementary Table 3. Compiled data from echo studies**

| Echo Data: | WT     | ±     | TazKD  | ±     | CMVad  | ±     | Desad  | ±     | Tazad  | ±     | CMVneo | ±     | Desneo | ±     | Tazneo | ±     |
|------------|--------|-------|--------|-------|--------|-------|--------|-------|--------|-------|--------|-------|--------|-------|--------|-------|
| IVSd       | 0.148  | 0.005 | 0.149  | 0.003 | 0.168  | 0.007 | 0.112  | 0.002 | 0.108  | 0.004 | 0.134  | 0.003 | 0.160  | 0.008 | 0.132  | 0.002 |
| LVIDd      | 0.216  | 0.011 | 0.275  | 0.003 | 0.287  | 0.005 | 0.318  | 0.008 | 0.268  | 0.008 | 0.214  | 0.009 | 0.276  | 0.007 | 0.273  | 0.004 |
| LVPWd      | 0.149  | 0.006 | 0.147  | 0.004 | 0.157  | 0.005 | 0.144  | 0.006 | 0.191  | 0.006 | 0.164  | 0.004 | 0.162  | 0.008 | 0.181  | 0.006 |
| IVSs       | 0.211  | 0.006 | 0.197  | 0.003 | 0.236  | 0.008 | 0.177  | 0.003 | 0.168  | 0.005 | 0.187  | 0.004 | 0.231  | 0.010 | 0.204  | 0.002 |
| LVIDs      | 0.083  | 0.007 | 0.176  | 0.002 | 0.160  | 0.004 | 0.193  | 0.006 | 0.132  | 0.007 | 0.107  | 0.007 | 0.137  | 0.005 | 0.143  | 0.004 |
| LVPWs      | 0.204  | 0.005 | 0.175  | 0.004 | 0.203  | 0.005 | 0.178  | 0.005 | 0.236  | 0.004 | 0.205  | 0.003 | 0.202  | 0.008 | 0.229  | 0.005 |
| EDV        | 0.032  | 0.005 | 0.058  | 0.002 | 0.065  | 0.003 | 0.094  | 0.004 | 0.057  | 0.004 | 0.034  | 0.004 | 0.061  | 0.007 | 0.057  | 0.002 |
| ESV        | 0.002  | 0.001 | 0.016  | 0.001 | 0.013  | 0.001 | 0.023  | 0.002 | 0.009  | 0.001 | 0.005  | 0.001 | 0.008  | 0.001 | 0.010  | 0.001 |
| FS%        | 61.442 | 1.977 | 36.335 | 0.465 | 45.075 | 1.025 | 42.182 | 0.742 | 50.977 | 1.285 | 52.257 | 1.448 | 51.415 | 1.267 | 48.241 | 1.087 |
| EF%        | 92.975 | 0.884 | 72.441 | 0.628 | 81.239 | 0.923 | 79.052 | 0.748 | 86.265 | 0.889 | 86.563 | 1.123 | 86.642 | 0.876 | 83.473 | 0.960 |

Data include those used to calculate FS% (fractional shortening) and EF% (ejection fraction), presented in the bottom two rows.

Green highlighting, CMV-TAZ; orange, Des-TAZ; blue, Taz-TAZ.

ad, adult administration; EDV, end diastolic volume; ESV, end systolic volume; IVSd, interventricular septal thickness – diastole; IVSs, Interventricular septal thickness - systole; LVIDd, left ventricular internal diameter end diastole; LVIDs, left ventricular internal diameter end systole; LVPWd, left ventricular posterior wall end diastole; LVPWs, left ventricular posterior wall end systole; neo, neonatal administration.
